# Supplementary material for: Delayed cardiac repolarisation as a predictor of in-hospital mortality in patients with COVID-19
Source: HighWire-hosted journal article supplement (doi:10.1136/heartjnl-2021-320412), 2022-02-10
Supplement: heartjnl-2021-320412supp001_data_supplement.pdf [file heartjnl-2021-320412supp001_data_supplement.pdf]

**Supplemental Material****eFigure 1-** Calibration Plot for Prediction Model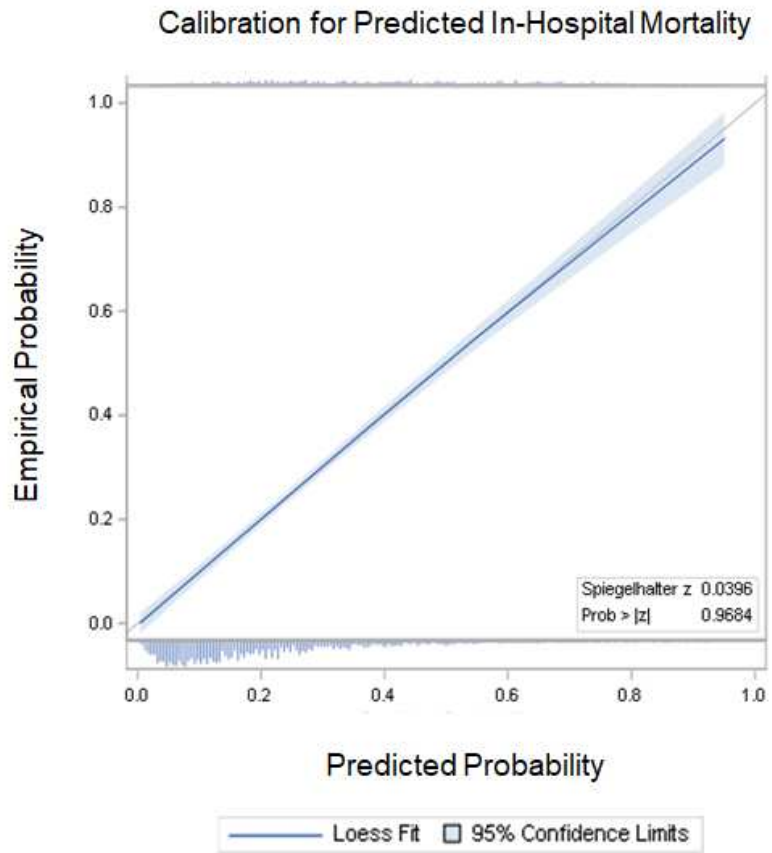

**eFigure 2-** Receiver Operating Curve for Final Multivariable Logistic Regression Model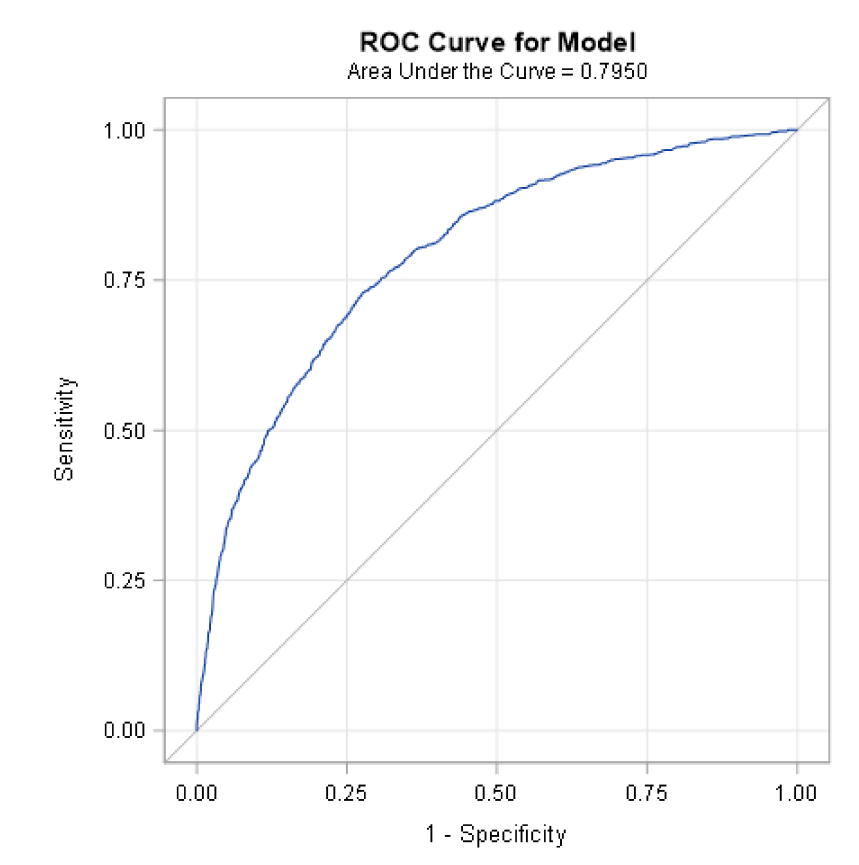

The result from the Hosmer and Lemeshow goodness-of-fit test (H-L GOF) when number of partitions was 20 groups yielded  $p=0.68$  in the training set and 0.39 in the internal validation set. Though the results from the H-L GOF yielded  $p=0.12$  for the original model evaluated in the external validation set, the results from the H-L GOF yielded  $p=0.63$  for the risk prediction sum score on the external validation set, indicating there was insufficient evidence to demonstrate a poor fit of the model utilizing the risk prediction tool.
